# Supplementary material for: The evolution of genome compression and genomic novelty in RNA viruses
Source: HighWire-hosted journal article supplement (doi:10.1101/gr.6305707), 2007-09-04
Supplement: Supp_Mat.pdf [file Supp_Mat.pdf]

Table S1. Percentage of the four nucleotides found at the three codon positions. Figures calculated by summing across all non-overlapping genes in all viral genomes examined.

| Nucleotide | First codon position | Second codon position | Third codon position |
|------------|----------------------|-----------------------|----------------------|
| A          | 30.6                 | 31.2                  | 26.0                 |
| G          | 30.9                 | 17.0                  | 22.6                 |
| C          | 18.6                 | 22.9                  | 21.8                 |
| T          | 19.8                 | 28.9                  | 29.6                 |

Table S2. As Table 2 in main text, but we have excluded all genes that contain potentially misleading features such as multiple overlaps, internal frameshifts, splicing, or reverse complementation. (The cutoff for homology is  $10^{-3}$  as in Table 2.)

| Overlap Type     | Gene Type  | Number | Mean PDI           | Number<br>Nucleocapsid<br>or Replicase | Number<br>+1/-1<br>frameshift |
|------------------|------------|--------|--------------------|----------------------------------------|-------------------------------|
| Internal Overlap | Primary    | 31     | 6.4 <sup>***</sup> | 14 <sup>***</sup>                      | 24/7 <sup>**</sup>            |
|                  | Secondary  |        | 1.7 <sup>*</sup>   | 0 <sup>*</sup>                         |                               |
| Terminal Overlap | 3' Overlap | 76     | 5.0 <sup>***</sup> | 18 <sup>NS</sup>                       | 34/42 <sup>NS</sup>           |
|                  | 5' Overlap |        | 3.5 <sup>NS</sup>  | 18 <sup>NS</sup>                       |                               |
| Non-Overlapping  | NA         | 322    | 2.2                | 57                                     | NA                            |

Figure S1. Relationship between gene overlap (arcsin-sqrt) and information length (ln). Gene overlap is the angle whose sine is the square root of the overlap as a proportion of the information length. Information length is the natural logarithm of genome length plus overlap length.

Untransformed values for both axes are shown in the inset. Points are means for the following taxa.

1 - Acyrthosiphon pisum virus (n=1); 2 - Arenaviridae (n=11); 3 - Arteriviridae (n=4); 4 - Astroviridae (n=6); 5 - Barnaviridae (n=1); 6 - Beet western yellows ST9 associated virus (n=1); 7 - Benyvirus (n=2); 8 - Birnaviridae (n=5); 9 - Bornaviridae (n=1); 10 - Botrytis virus F (n=1); 11 - Botrytis virus X (n=1); 12 - Bromoviridae (n=22); 13 - Bunyaviridae (n=20); 14 - Caliciviridae (n=13); 15 - Caulimoviridae (n=23); 16 - Cheravirus (n=2); 17 - Chrysoviridae (n=1); 18 - Closteroviridae (n=16); 19 - Comoviridae (n=18); 20 - Coronaviridae (n=12); 21 - Cystoviridae (n=4); 22 - Diaporthe ambigua RNA virus 1 (n=1); 23 - Dicistroviridae (n=12); 24 - Endornavirus (n=1); 25 - Filoviridae (n=4); 26 - Flaviviridae (n=34); 27 - Flexiviridae (n=52); 28 - Furovirus (n=5); 29 - Fusarium graminearum dsRNA mycovirus-1 (n=1); 30 - Hepadnaviridae (n=10); 31 - Hepeviridae (n=1); 32 - Hordeivirus (n=1); 33 - Hypoviridae (n=4); 34 - Idaeovirus (n=1); 35 - Iflavirus (n=7); 36 - Leviviridae (n=8); 37 - Luteoviridae (n=17); 38 - Marnaviridae (n=1); 39 - Narnaviridae (n=8); 40 - Nodaviridae (n=8); 41 - Ophiovirus (n=3); 42 - Orthomyxoviridae (n=5); 43 - Oyster mushroom spherical virus (n=1); 44 - Paramyxoviridae (n=28); 45 - Partitiviridae (n=14); 46 - Pecluvirus (n=2); 47 - Picobirnavirus (n=1); 48 - Picornaviridae (n=31); 49 - Pomovirus (n=4); 50 - Potyviridae (n=54); 51 - Reoviridae (n=21); 52 - Retroviridae (n=40); 53 - Rhabdoviridae (n=17); 54 - Sclerophthora macrospora virus A (n=1); 55 - Sequiviridae (n=6); 56 - Sobemovirus (n=9); 57 - Tenuivirus (n=2); 58 - Tetraviridae (n=4); 59 - Thielaviopsis basicola dsRNA virus 1 (n=1); 60 - Tobamovirus (n=15); 61 - Tobravirus (n=3); 62 - Togaviridae (n=16); 63 - Tombusviridae (n=35); 64 - Totiviridae (n=20); 65 - Tymoviridae (n=12); 66 - Umbravirus (n=4).

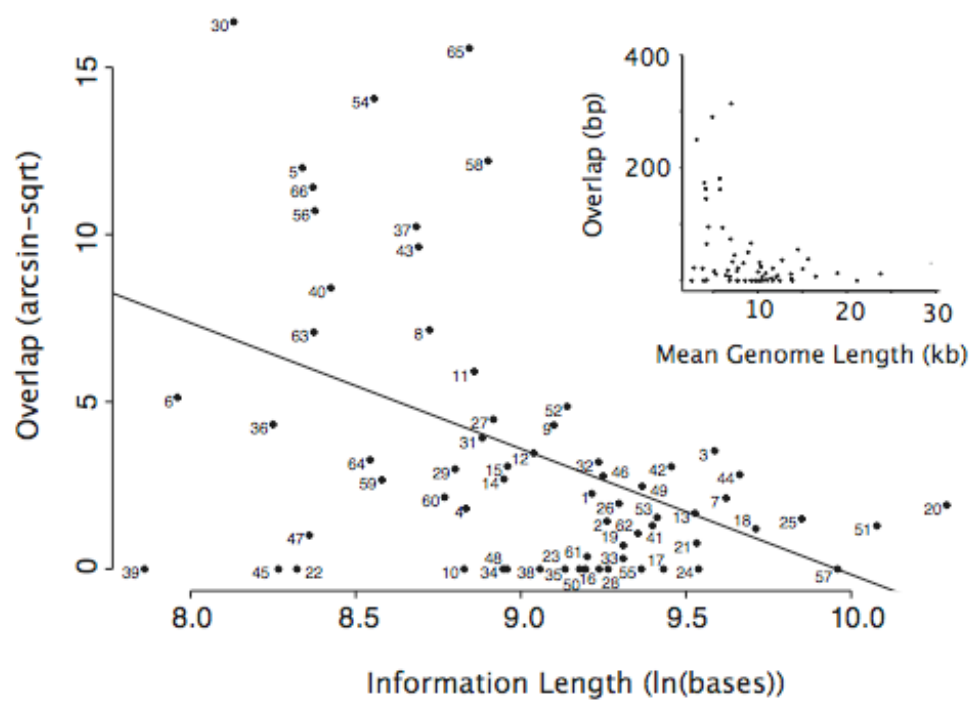

Figure S2. Observed overlap frequency distributions (each value is the mean of an homologous group): (A) Internal Overlaps. (B) Terminal Overlaps. Histograms represent all genes while lines represent a smaller dataset consisting only of genes with no potentially complicating factors such as splicing, internal frameshifting or multiple overlaps. Note the absence of very short Internal Overlaps in the smaller dataset (these are small overlapped components of larger spliced genes).

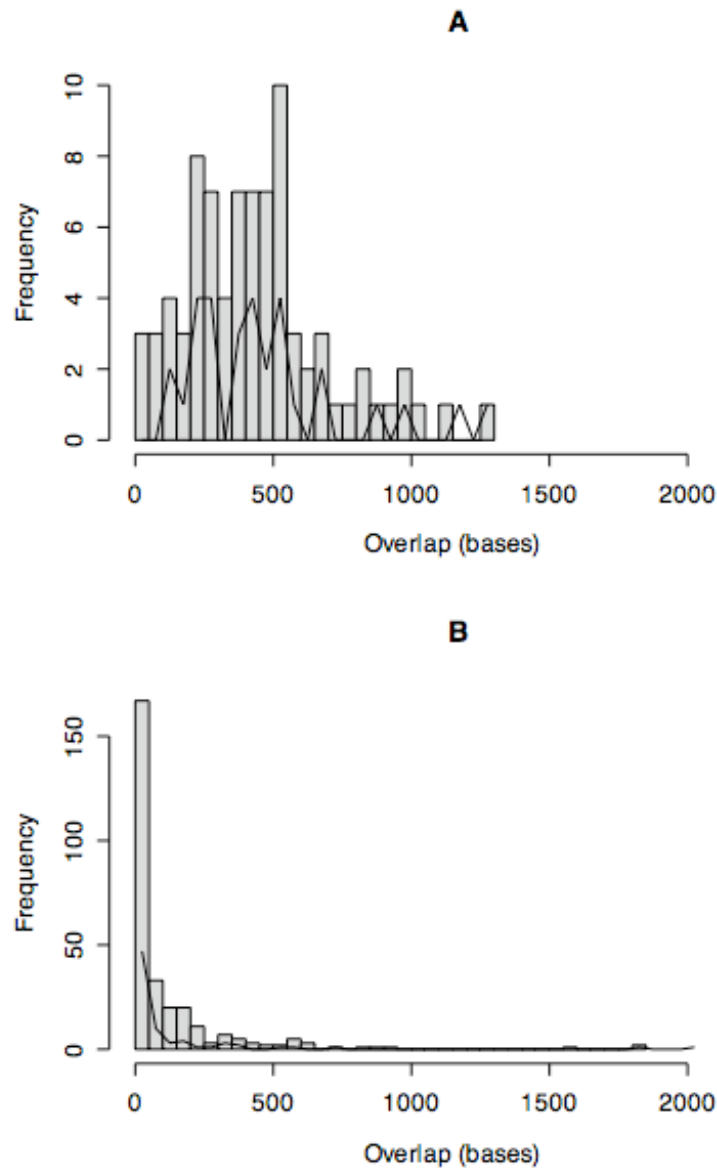

## R script for fitness simulation (also given in Archive)

The following three scripts (which need to be cut and pasted) show simulations of the effect of increasing the proportion of the genome in an overlap on the fitness effect of mutations.

1. Basic script showing the effect of gene overlap on a multiplicative model of fitness.
2. Different models of the effect multiple mutations on fitness: comparing multiplicative to synergistic etc
3. Effect of reducing the per genome mutation rate on the effect of gene overlap with the basic multiplicative model

#---First script: for showing the effect of gene overlap on a multiplicative model of fitness -----

```
rm(list=ls())          # Delete all existing variables
```

```
m = 0.0001 # mutation rate per bp
g = 10000 # starting genome size (no overlap)
s = 0.1 # selection coefficient
```

```
fitness = NULL
prog_fit = NULL # fitness of progeny with increasing numbers of mutations
total_prog_fit = NULL # fitness of progeny = sum of frequency of each mutant class of progeny
multiplied by its fitness
prop = NULL
```

```
class_fitness <- function(n, p) { # function for determining total number of mutations: those that
fall in regions of gene overlap count twice!
  prob_over = (p/2)/((1-p)+(p/2)) # probability of mutation falling in region of overlap
  for (k in 0:n) { # go through all possible combinations of 0 -> n mutations falling in
regions of overlap
    #exp_freq = (exp(-prob_over)*(prob_over^k))/factorial(k)
    exp_freq = prob_over^k * (1-prob_over)^(n-k) * (factorial(n) / (factorial(k) *
factorial(n - k))) # relative expected frequencies. factorial(n) / (factorial(k) * factorial(n - k)) is the
binomial coefficient = number of combinations in which can achieve this number of mutations in
overlap
    fitness[k+1] = exp_freq * exp( - s * ( (k*2) + (n-k) ) )
  }
  return(sum(fitness))
}
```

```
for(i in 0:100) {
  p = i/100 # just converting p from an integer to a proportion
  u = m * g * (1 - p/2) # adjust per genome mutation rate to allow for compression due to
overlap
  freq = exp(-u) # need frequency of zero class at start
```

```

    prog_fit[1] = freq * 1 # = frequency of progeny with zero mutations multiplied by their
    fitness, which equals one (= exp(- s * 0))
    for(n in 1:10) { # no need to go beyond frequency of progeny with 5 mutations
    (proportion is < 0.001)
        freq = freq * (u/n)
        prog_fit[n+1] = freq * class_fitness(n, p) # multiply frequency of each class by its
    fitness

    }
    total_prog_fit[i+1] = sum(prog_fit)
    prop[i+1] = p # just for plotting
}

plot(prop, total_prog_fit, col=1, type="l", xlab="overlap", ylab="fitness", main="", frame.plot =
FALSE)

```

```

#---Second script: for comparing different models for the impact of multiple mutations on fitness
rm(list=ls()) # Delete all existing variables

```

```

m = 0.0001 # mutation rate per bp
g = 10000 # starting genome size (no overlap)
s = 0.1 # selection coefficient
b = 0.01 # second selection coefficient for epistasis
fitness = NULL
prog_fit_mult = NULL # fitness of progeny with increasing numbers of mutations
total_prog_fit_mult = NULL # fitness of progeny = sum of frequency of each mutant class of
progeny multiplied by its fitness
prog_fit_mult2 = NULL # as above, but for alternative model of multiplicative fitness
interactions
total_prog_fit_mult2 = NULL # # as above, but for alternative model of multiplicative fitness
interactions
prog_fit_ant_epi = NULL # as above, but for antagonistic epistasis
total_prog_fit_ant_epi = NULL # as above, but for antagonistic epistasis
prog_fit_syn_epi = NULL # as above, but for synergistic epistasis
total_prog_fit_syn_epi = NULL # as above, but for synergistic epistasis
prog_fit_add = NULL # as above, but for additive fitness
total_prog_fit_add = NULL # as above, but for additive fitness
prop = NULL

```

```

# basic multiplicative fitness
class_fitness_mult <- function(n, p) { # function for determining total number of mutations: those
that fall in regions of gene overlap count twice!
    prob_over = (p/2)/((1-p)+(p/2)) # probability of mutation falling in region of overlap

    for (k in 0:n) { # go through all possible combinations of 0 -> n mutations falling in
regions of overlap

```

```

        bin_coeff = factorial(n) / (factorial(k) * factorial(n - k)) # binomial coefficient =
number of combinations in which can achieve this number of muattions in overlap
        exp_freq = prob_over^k * (1-prob_over)^(n-k) * bin_coeff # relative expected
frequencies
        fitness[k+1] = exp_freq * exp( - s * ( (k*2) + (n-k) ) )
    }
    return(sum(fitness))
}

```

# alternative multiplicative fitness

```

class_fitness_mult2 <- function(n, p) { # function for determining total number of mutations:
those that fall in regions of gene overlap count twice!

```

```

    prob_over = (p/2)/((1-p)+(p/2)) # probability of mutation falling in region of overlap

```

```

    for (k in 0:n) { # go through all possible combinations of 0 -> n mutations falling in
regions of overlap

```

```

        bin_coeff = factorial(n) / (factorial(k) * factorial(n - k)) # binomial coefficient =
number of combinations in which can achieve this number of muattions in overlap

```

```

        exp_freq = prob_over^k * (1-prob_over)^(n-k) * bin_coeff # relative expected
frequencies

```

```

        fitness[k+1] = exp_freq * (1 - s)^((k*2) + (n-k))
    }
    return(sum(fitness))
}

```

# antagonistic epistasis

```

class_fitness_ant_epi <- function(n, p) {

```

```

    b = 0.01 # second selection coefficient for epistasis

```

```

    prob_over = (p/2)/((1-p)+(p/2))

```

```

    for (k in 0:n) { # go through all possible combinations of 0 -> n mutations falling in
regions of overlap

```

```

        bin_coeff = factorial(n) / (factorial(k) * factorial(n - k)) # binomial coefficient =
number of combinations in which can achieve this number of muattions in overlap

```

```

        exp_freq = prob_over^k * (1-prob_over)^(n-k) * bin_coeff # relative expected
frequencies

```

```

        fitness[k+1] = exp_freq * exp(- s * ((k*2) + (n-k)) + b * ((k*2) + (n-k))^2)
    }
    return(sum(fitness))
}

```

# synergistic epistasis

```

class_fitness_syn_epi <- function(n, p) {

```

```

    b = 0.02 # second selection coefficient for epistasis

```

```

    prob_over = (p/2)/((1-p)+(p/2))

```

```

    for (k in 0:n) { # go through all possible combinations of 0 -> n mutations falling in
regions of overlap

```

```

        bin_coeff = factorial(n) / (factorial(k) * factorial(n - k)) # binomial coefficient =
number of combinations in which can achieve this number of muattions in overlap
        exp_freq = prob_over^k * (1-prob_over)^(n-k) * bin_coeff # relative expected
frequencies
        fitness[k+1] = exp_freq * exp(- s * ((k*2) + (n-k)) - b * ((k*2) + (n-k))^2)
    }
    return(sum(fitness))
}

```

# additive epistasis

```

class_fitness_add <- function(n, p) {
    prob_over = (p/2)/((1-p)+(p/2))
    for (k in 0:n) { # go through all possible combinations of 0 -> n mutations falling in
regions of overlap
        bin_coeff = factorial(n) / (factorial(k) * factorial(n - k)) # binomial coefficient =
number of combinations in which can achieve this number of muattions in overlap
        exp_freq = prob_over^k * (1-prob_over)^(n-k) * bin_coeff # relative expected
frequencies
        fitness[k+1] = exp_freq * (1 - (s * ((k*2) + (n-k))))
    }
    return(sum(fitness))
}

```

```

for(i in 0:100) {
    p = i/100 # just converting p from an integer to a proportion
    u = m * g * (1 - p/2) # adjust per genome mutation rate due to overlap
    freq = exp(-u) # need frequency of zero class at start
    prog_fit_mult[1] = freq * 1 # = frequency of progeny with zero mutations multiplied by
their fitness, which equals one (= exp(- s * 0 ))
    prog_fit_mult2[1] = freq * 1
    prog_fit_ant_epi[1] = freq * 1 # same for all fitness functions
    prog_fit_syn_epi[1] = freq * 1
    prog_fit_add[1] = freq * 1
    for(n in 1:10) { # no need to go beyond frequency of progeny with 5 mutations
(proportion is < 0.001)
        freq = freq * (u/n)
        prog_fit_mult[n+1] = freq * class_fitness_mult(n, p) # multiply frequency of each
class by its fitness
        prog_fit_mult2[n+1] = freq * class_fitness_mult2(n, p) # multiply frequency of
each class by its fitness
        prog_fit_ant_epi[n+1] = freq * class_fitness_ant_epi(n, p) # multiply frequency of
each class by its fitness
        prog_fit_syn_epi[n+1] = freq * class_fitness_syn_epi(n, p) # multiply frequency
of each class by its fitness
    }
}

```



```

        prog_fit_add[n+1] = freq * class_fitness_add(n, p) # multiply frequency of each
class by its fitness

```

```

    }
    total_prog_fit_mult[i+1] = sum(prog_fit_mult)
    total_prog_fit_mult2[i+1] = sum(prog_fit_mult2)
    total_prog_fit_ant_epi[i+1] = sum(prog_fit_ant_epi)
    total_prog_fit_syn_epi[i+1] = sum(prog_fit_syn_epi)
    total_prog_fit_add[i+1] = sum(prog_fit_add)
    prop[i+1] = p # just for plotting

}

plot(prop, total_prog_fit_mult/total_prog_fit_mult[1], col=1, type="l", ylim = range(0.98, 1.02),
xlab="Prop overlap", ylab="Fitness", main="", frame.plot = FALSE)
points(prop, total_prog_fit_mult2/total_prog_fit_mult2[1], col=2, type="l")
points(prop, total_prog_fit_ant_epi/total_prog_fit_ant_epi[1], col=3, type="l")
points(prop, total_prog_fit_syn_epi/total_prog_fit_syn_epi[1], col=4, type="l")
points(prop, total_prog_fit_add/total_prog_fit_add[1], col=5, type="l")
legend(x="topright", legend=c("mult", "mult2", "ant_epi", "syn_epi", "add"), fill= 1:5, bty="n")

```

#---Third script: for showing the effect of reducing per genome mutation rate on the basic multiplicative model

```

rm(list=ls())          # Delete all existing variables

```

```

s = 0.1 # selection coefficient
fitness = NULL
k.values = NULL
prog_fit = NULL # fitness of progeny with increasing numbers of mutations
total_prog_fit = NULL # fitness of progeny = sum of frequency of each mutant class of progeny
multiplied by its fitness
prop = NULL
slope = NULL
mut_rate = NULL
start_m = 0.0001 # starting mutation rate per bp
g = 10000 # genome size (no overlap)

```

```

class_fitness <- function(n, p) { # function for determining total number of mutations: those that
fall in regions of gene overlap count twice!

```

```

    prob_over = (p/2)/((1-p)+(p/2)) # probability of mutation falling in region of overlap
    for (k in 0:n) { # go through all possible combinations of 0 -> n mutations falling in
regions of overlap
        bin_coeff = factorial(n) / (factorial(k) * factorial(n - k)) # binomial coefficient =
number of combinations in which can achieve this number of muattions in overlap

```

```

    exp_freq = prob_over^k * (1-prob_over)^(n-k) * bin_coeff # relative expected
frequencies
    fitness[k+1] = exp_freq * exp( - s * ( (k*2) + (n-k) ) )
  }
  return(sum(fitness))
}

for(j in 1:100) {
  m = start_m/j # reducing mutation rate
  for(i in 0:100) {
    p = i/100 # just converting p from an integer to a proportion
    u = m * g * (1 - p/2) # adjust per genome mutation rate due to overlap
    freq = exp(-u) # need frequency of zero class at start
    prog_fit[1] = freq * 1 # = frequency of progeny with zero mutations multiplied by
their fitness, which equals one (= exp(- s * 0 ))
    for(n in 1:5) { # no need to go beyond frequency of progeny with 5 mutations
(proportion is < 0.001)
      freq = freq * (u/n)
      prog_fit[n+1] = freq * class_fitness(n, p) # multiply frequency of each
class by its fitness
    }
    total_prog_fit[i+1] = sum(prog_fit)
    prop[i+1] = p
  }
  saved.lm = lm(total_prog_fit ~ prop)
  slope[j] = saved.lm$coefficients[2]
  mut_rate[j] = m
}

plot(mut_rate, slope, col=1, type="l", xlab="mut rate", ylab="slope", main="", frame.plot =
FALSE)

```
